# Supplementary material
Source: PubMed Central journal article supplement (PMC7378881)
Supplement: NIHMS1606404-supplement-supplemental_table_1.pdf [file NIHMS1606404-supplement-supplemental_table_1.pdf]

Supplemental Table 1: Patient characteristics

|                                   | <b>Mean (SD)</b> |
|-----------------------------------|------------------|
| Age                               | 73.7 (8.0)       |
| Comorbid conditions               | 3.06 (1.7)       |
| Body mass index                   | 29 (8.1)         |
| Number of medications             | 11.7 (6.7)       |
| SLUMS score                       | 22.9 (3.5)       |
|                                   |                  |
|                                   | <b>n (%)</b>     |
| Completed high school education   | 12 (66.7)        |
| Planned surgical procedure        |                  |
| Inguinal or ventral hernia repair | 10 (55.5)        |
| Cholecystectomy                   | 2 (11.1)         |
| Colectomy                         | 2 (11.1)         |
| Ileostomy or colostomy reversal   | 2 (11.1)         |
| Nissen fundoplication             | 1 (5.6)          |
| Abdominal aortic aneurysm repair  | 1 (5.6)          |

**Supplemental Table 1 Legend**

Abbreviations: SD = standard deviation; SLUMS = St. Louis University Mental Status exam

Score is adjusted for education level attained
