# Supplementary material
Source: PubMed Central journal article supplement (PMC7378881)
Supplement: NIHMS1606404-supplement-supplemental_table_2.pdf [file NIHMS1606404-supplement-supplemental_table_2.pdf]

Supplemental Table 2: Primary initiator of surgical delay

| <b>All patients who delayed surgery (n = 18)</b> | <b>n (%)</b> |
|--------------------------------------------------|--------------|
| Provider-driven                                  | 11 (61.1)    |
| Comorbid issue management                        | 10 (55.6)    |
| Needed more workup                               | 1 (5.6)      |
| Patient-driven                                   | 4 (22.2)     |
| Issue with social support                        | 2 (11.1)     |
| Hesitation and anxiety about surgery             | 2 (11.1)     |
| Logistical                                       | 3 (16.7)     |
| Surgery needed different equipment               | 2 (11.1)     |
| Unable to find transportation                    | 1 (5.6)      |
