# Supplementary material
Source: PubMed Central journal article supplement (PMC7378881)

Supplemental Figure 1: Process for identifying cases included in series

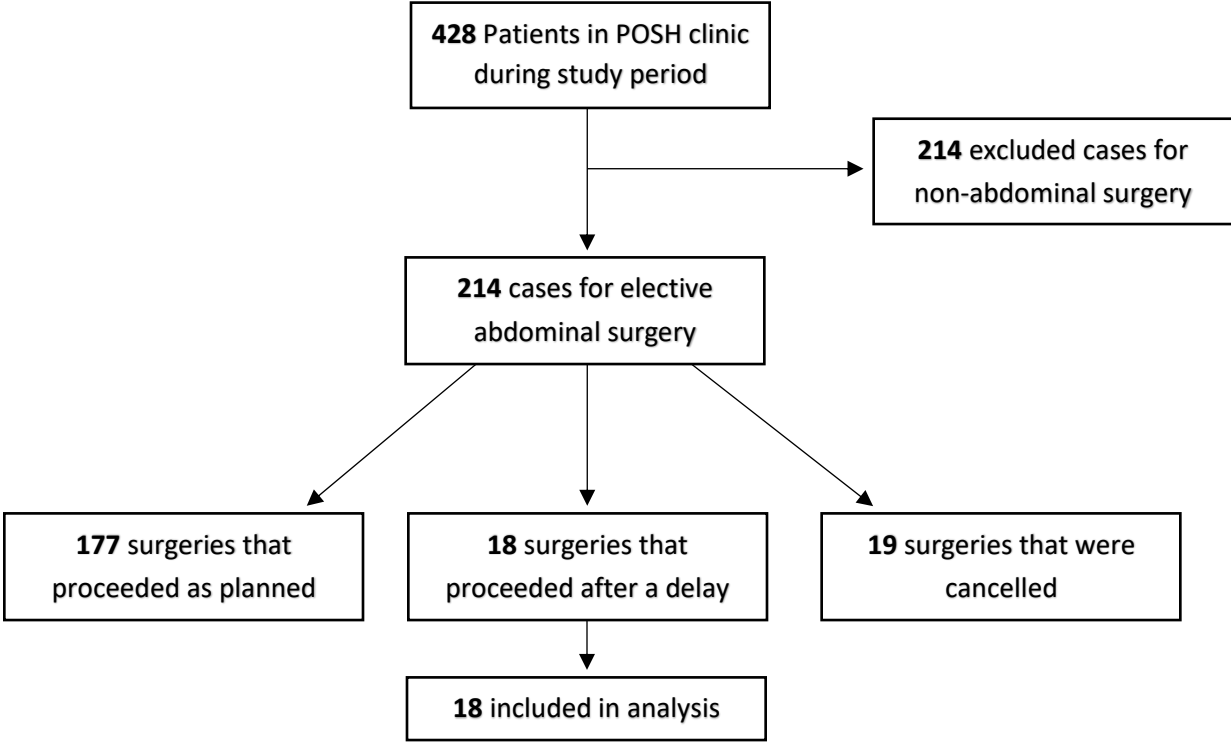

Supplement: NIHMS1606404-supplement-supplemental_figure_1.pdf [file NIHMS1606404-supplement-supplemental_figure_1.pdf]
